# Supplementary material for: Mesophotic fish communities of the ancient coastline in Western Australia
Source: PLoS One. 2021 Apr 21;16(4):e0250427. doi: 10.1371/journal.pone.0250427 (PMC8059809; doi:10.1371/journal.pone.0250427)
Supplement: S1 Fig — Hard complex substrate (boulder/reef and rubble) were highest in Areas 1 and 5, which also comprised the highest abundance of benthic biota (n refers to the number of BRUVS deployments). (DOCX) [file pone.0250427.s001.docx]

Mesophotic fish communities of the ancient coastline in Western Australia

Leanne M. Currey-Randall1*, Ronen Galaiduk2, Marcus Stowar1, Brigit I. Vaughan2, Karen J. Miller2

1Australian Institute of Marine Science, Townsville, Queensland, Australia

2Australian Institute of Marine Science, Indian Ocean Marine Research Centre, University of Western Australia, Crawley, Western Australia, Australia

* Corresponding author

E-mail: l.currey@aims.gov.au (LMCR)


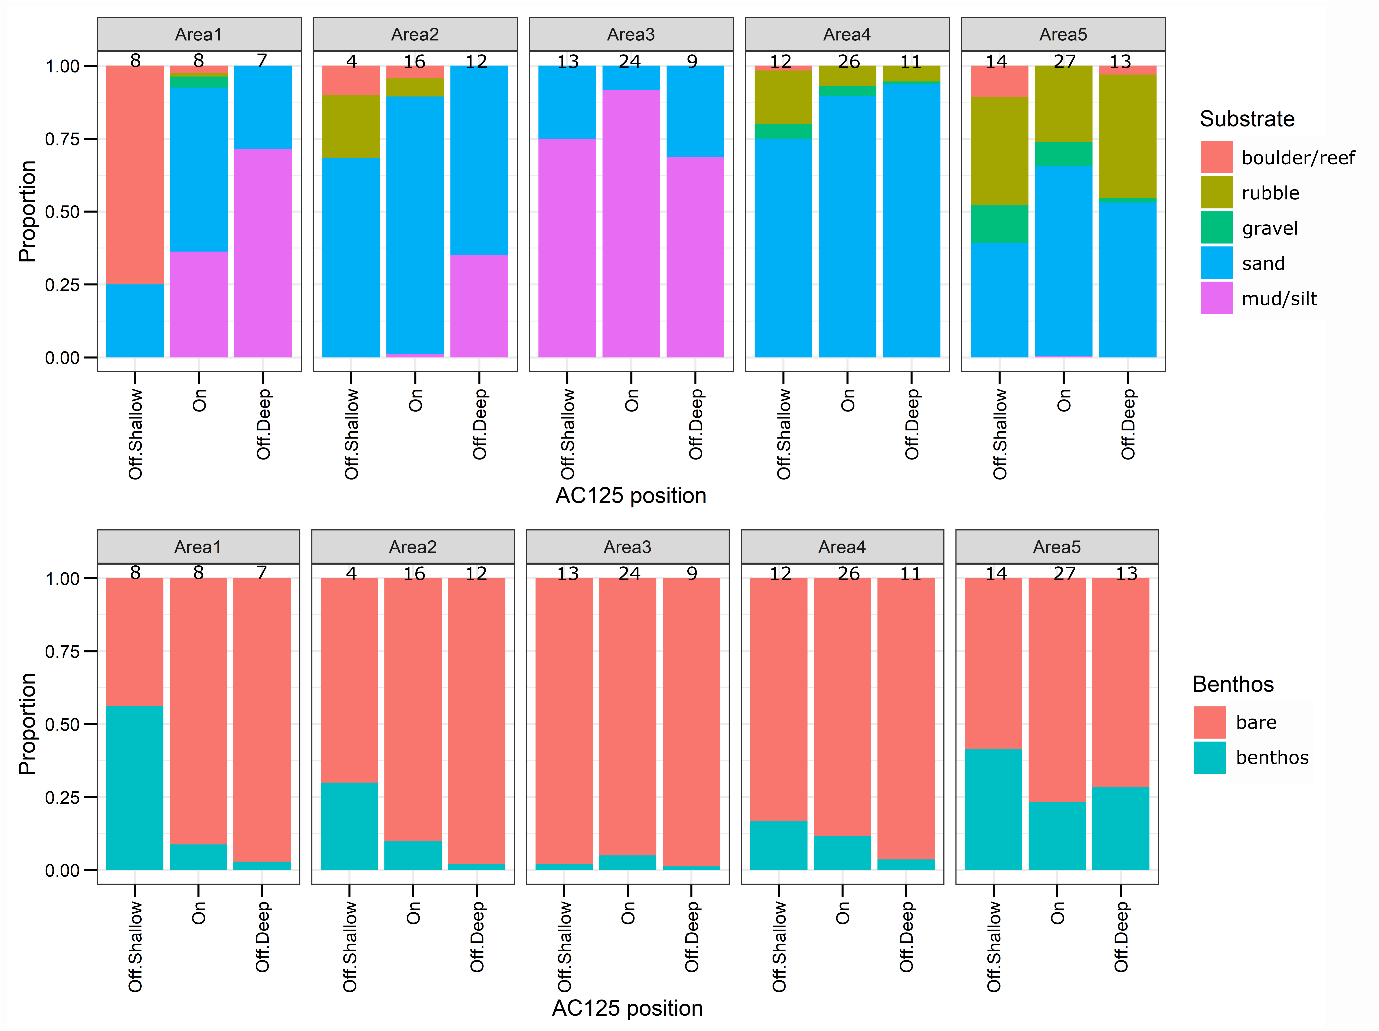


S1 Fig. Substrate and benthos at each Area along the AC125. Hard complex substrate (boulder/reef and rubble) were highest in Areas 1 and 5, which also comprised the highest abundance of benthic biota (n refers to the number of BRUVS deployments).
